# Supplementary material
Source: ML conference proceedings conference paper supplement (https://openaccess.thecvf.com/content/ICCV2023/html/QI_FateZero_Fusing_Attentions_ICCV_2023_paper.html)
Supplement: Supplementary file 1 [file QI_FateZero_Fusing_Attentions_ICCV_2023_supplemental.pdf]

# FateZero: Fusing Attentions for Zero-shot Text-based Video Editing

## Supplemental Material

Chenyang Qi<sup>1\*</sup> Xiaodong Cun<sup>2†</sup> Yong Zhang<sup>2</sup> Chenyang Lei<sup>3</sup>  
Xintao Wang<sup>2</sup> Ying Shan<sup>2</sup> Qifeng Chen<sup>1†</sup>

<sup>1</sup>HKUST <sup>2</sup>Tencent AI Lab <sup>3</sup>CAIR, HKISI-CAS

<https://fate-zero-edit.github.io>

### A. Implementation Details

**Pseudo algorithm code** Our full algorithm is shown in Algorithm 1 and Algorithm 2. Algorithm 1 presents the overall framework of our inversion and editing, as visualized in the left of Fig. 1 in the main paper. Algorithm 2 shows that the cross-attention is fused based on a mask of the edited words, and the self-attention is blended using a binary mask from thresholding the cross-attention (the right of Fig. 1 in the main paper).

**Hyperparameters Tuning.** There are mainly three hyperparameters in our proposed designs:

-  $t_s \in [1, T]$ : Last timestep of the self-attention blending. Smaller  $t_s$  fuses more self-attention from inversion to preserve structure and motion.

-  $t_c \in [1, T]$ : Last timestep of the cross attention fusion. Smaller  $t_c$  fuses more cross attention from inversion to preserve the spatial semantic layout.

-  $\tau \in [0, 1]$ : Threshold for the blending mask used in shape editing. Smaller  $\tau$  uses more self-attention map from editing to improve shape editing results.

In **style** and **attribute** editing, we set  $t_s = 0.2T$ ,  $t_c = 0.3T$ ,  $\tau = 1.0$  to preserve most structure and motion in the source video. In **shape** editing, we set  $t_s = 0.5T$ ,  $t_c = 0.5T$ ,  $\tau = 0.3$  to give more freedom in new motion and 3D shape generation.

### B. More results

#### B.1. Inpainting

We implement the latent inpainting for shape editing (*silver jeep*  $\rightarrow$  *Porsche car*) as in the below figure. The edited background is identical to the input.

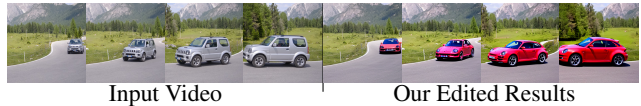

#### B.2. Source Similarity and Warping-error.

Note that the video editing quality can not be well evaluated by the similarity with the original video using the “frame-wise L1 distance” (as it reaches its minimum in the unedited video) or “warping error” (unsuitable for our general editing task that produces new shape and attribute). Thus, we follow previous video editing works (NLA [4], Text2live [1], Shape-aware [5], Vtoonify [6], GEN-1 [2]) to design the metrics. Here, the table below is provided as a reference, where our method achieves the best temporal consistency and the second similarity with the source video.

| Method           | Frame-Null   | Frame-SDEdit | NLA-Null | Tune-A-Video | Ours         |
|------------------|--------------|--------------|----------|--------------|--------------|
| L1-Src-Distance↓ | 0.118        | <b>0.079</b> | 0.126    | 0.181        | <u>0.114</u> |
| Warping-error↓   | <u>0.207</u> | 0.285        | 0.255    | 0.314        | <b>0.163</b> |

#### B.3. Quantitative Ablation on Self-attention Fusion.

We provide the results on shape editing videos in the table below. We use both CLIP metrics (Tem-Con. / Fram-Acc. as in the paper), and pixel-wise similarity (L1 and warping errors). Our full method achieves the best clip metrics and  $2^{nd}$  similarity with the source video. Note that, fusing self-attention at each pixel without a spatial mask severely reduces the editing quality, which produces the worst Tem-Con/Fram-Acc.

| Method                      | w/ recon-attn | w/o self-attn | Self-attn w/o mask | Ours               |
|-----------------------------|---------------|---------------|--------------------|--------------------|
| Tem-Con↑/Fram-Acc↑          | 0.968/0.987   | 0.969/0.990   | 0.956/0.908        | <b>0.970/0.993</b> |
| L1-Distance↓/Warping-error↓ | 0.154/0.212   | 0.143/0.219   | <b>0.093/0.130</b> | <u>0.118/0.181</u> |

### C. Demo Video

we provide a detailed demo video to show:

**Video Results** on style, local attribute, and shape editing to validate the effectiveness of the proposed method.

\*Intern at tencent AI Lab

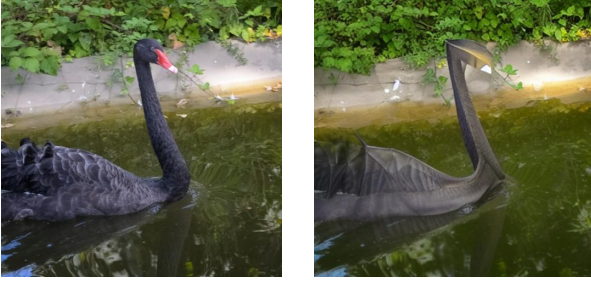

black swan → yellow pterosaur.

Figure 1. limitation of our zero-shot editing.

**Method Animation** to provide a better understanding of the proposed method.

**Baseline Comparisons** with previous methods in video.

**More Promising Applications** We have shown the effectiveness of the proposed method in the main paper for style, attribution, and shape editing. In the demo video, we also show some potential applications of the proposed method, including (1) object removal by removing the word of the target object in the source prompt and mask the self-attention of the corresponding area using its cross attention, (2) video enhancement by adding the specific prompt (e.g., ‘high-quality’, ‘8K’) in the target editing prompt.

## D. Limitation and Future Work

Our zero-shot editing is not good at new concept composition or generation of very different shapes. For example, the result of editing ‘black swan’ to ‘yellow pterosaur’ in Fig 1 is unsatisfactory. This problem may be alleviated using a stronger video diffusion model, which we leave to future work.

## References

- [1] Omer Bar-Tal, Dolev Ofri-Amar, Rafail Fridman, Yoni Kasten, and Tali Dekel. Text2live: Text-driven layered image and video editing. In *European Conference on Computer Vision*, pages 707–723. Springer, 2022. 1
- [2] Patrick Esser, Johnathan Chiu, Parmida Atighehchian, Jonathan Granskog, and Anastasis Germanidis. Structure and content-guided video synthesis with diffusion models. *arXiv preprint arXiv:2302.03011*, 2023. 1
- [3] Amir Hertz, Ron Mokady, Jay Tenenbaum, Kfir Aberman, Yael Pritch, and Daniel Cohen-Or. Prompt-to-prompt image editing with cross attention control. *arXiv preprint arXiv:2208.01626*, 2022. 2
- [4] Yoni Kasten, Dolev Ofri, Oliver Wang, and Tali Dekel. Layered neural atlases for consistent video editing. *ACM Transactions on Graphics (TOG)*, 40(6):1–12, 2021. 1
- [5] Yao-Chih Lee, Ji-Ze Genevieve Jang Jang, Yi-Ting Chen, Elizabeth Qiu, and Jia-Bin Huang. Shape-aware text-driven layered video editing demo. *arXiv preprint arXiv:2301.13173*, 2023. 1

---

## Algorithm 1 FateZero Algorithm

---

**Input:**

- $z_0$ : Latent code from source video
- $p_{src}$ : Source text prompt for input video
- $p_{edit}$ : Target text prompt for edition

**Hyperparameters:**

- $t_c$ : Last timestep of the cross attention fusion
- $t_s$ : Last timestep of the self attention blending
- $\tau$ : Threshold for blending mask

**Output:**

- $\hat{z}_0$ : Final edited latent code

▷ DDIM for inversion latents and attention maps

**for**  $t = 1, 2, \dots, T$  **do**

$$\epsilon_t, c_t^{src}, s_t^{src} \leftarrow \epsilon_\theta(z_t, t, p_{src})$$

$$z_t = \sqrt{\alpha_t} \frac{z_{t-1} - \sqrt{1 - \alpha_{t-1}} \epsilon_t}{\sqrt{\alpha_{t-1}}} + \sqrt{1 - \alpha_t} \epsilon_t$$

**end for**

▷ Denoising the inverted latents with attention fusion

**for**  $t = T, (T - 1), \dots, 1$  **do**

$$\text{Edited\_index} = (p_{src} \neq p_{edit})$$

▷ Cross-attention mask is from the edited index [3]

$$M_{\text{cross}}[\text{Edited\_index}] = 1$$

▷ Self-attention blending mask is from cross-attention.

$$M_{\text{self}} = (c_t^{src}[\text{Edited\_index}] > \tau)$$

$$\hat{\epsilon}_t \leftarrow \text{ATT-FUSION}(\epsilon_\theta, z_t, t, p_{edit}, M_{\text{edit}}, M_{\text{self}}, c_t^{src}, s_t^{src})$$

$$z_{t-1} = \sqrt{\alpha_{t-1}} \frac{z_t - \sqrt{1 - \alpha_t} \hat{\epsilon}_t}{\sqrt{\alpha_t}} + \sqrt{1 - \alpha_{t-1}} \hat{\epsilon}_t$$

**end for**

▷ Fuse the inversion and editing attention of all  $B$  blocks.

▷ We only show the operation of attention and omit the feed-forward, residual convolution layer for simplicity.

**function** ATT-FUSION( $\epsilon_\theta, z_t, t, p_{edit}, M_{\text{cross}}, M_{\text{self}}, c_t^{src}, s_t^{src}$ )

**for**  $i = 1 \dots B$  **do**

$$s_t^{\text{edit}} = \text{Softmax}(W_i^Q(z_t)W_i^K(z_t)/\sqrt{d_i})$$

$$s_t^{\text{fused}} = \text{SELF-BLENDING}(s_t^{\text{edit}}, s_t^{src}, M_{\text{self}}, c_t^{src}, t)$$

$$z_t = W_i^V(z_t) \cdot s_t^{\text{fused}}$$

$$c_t^{\text{edit}} = \text{Softmax}(W_i^Q(z_t)W_i^K(p_{edit})/\sqrt{d_i})$$

$$c_t^{\text{fused}} = \text{CROSS-FUSION}(c_t^{\text{edit}}, c_t^{src}, M_{\text{edit}}, t)$$

$$z_t = W_i^V(p_{edit}) \cdot c_t^{\text{fused}}$$

**end for**

**return**  $z_t$

**end function**

---

- [6] Shuai Yang, Liming Jiang, Ziwei Liu, and Chen Change Loy. Vtoonify: Controllable high-resolution portrait video style transfer. *ACM Transactions on Graphics (TOG)*, 41(6):1–15, 2022. 1

---

**Algorithm 2** Attention Fusion and Blending Algorithm

---

▷ Following prompt-to-prompt, Cross-attention fusion using the difference mask between source and editing prompt:  $M_{cross}$  with shape (text\_embedding, words\_count)

```
function CROSS-FUSION( $c_t^{edit}, c_t^{src}, M_{cross}, t$ )  
  if  $t > t_c$  then  
    return  $M_{cross} \cdot c_t^{edit} + (1 - M_{cross}) \cdot c_t^{src}$   
  else  
    return  $c_t^{edit}$   
  end if  
end function
```

▷ Self-attention blending with the mask from cross attention map:  $M_{self}$  with shape (1, height × width)

```
function SELF-BLENDING( $s_t^{edit}, s_t^{src}, c_t^{src}, M_{self}, t$ )  
  if  $t > t_s$  then  
    return  $M_{self} \cdot s_t^{edit} + (1 - M_{self}) \cdot s_t^{src}$   
  else  
    return  $s_t^{edit}$   
  end if  
end function
```

---
